# Supplementary material for: Pre-diagnosis meat intake and cooking method and ovarian cancer survival: results from the Ovarian Cancer Follow-Up Study (OOPS)
Source: Royal Society of Chemistry journal article supplement (doi:10.1039/d1fo03825g), 2022-01-01
Supplement: d1fo03825g1.pdf [file d1fo03825g1.pdf]

**Supplementary Table 1.** Specific food items included in the analysis of meat groups.

| <b>Meat group</b> | <b>Type of meat</b>                                                                                                                                                                                                                                                                                                                                   |
|-------------------|-------------------------------------------------------------------------------------------------------------------------------------------------------------------------------------------------------------------------------------------------------------------------------------------------------------------------------------------------------|
| Total meat        | meat (pork, beef, mutton, etc.), liver, organ meat (except liver), pig skin (with or without pork), roast sausages/ham sausages/meatball, etc. (not curing), bacon/sausages/ham, poultry (chicken, duck, goose, etc.), shellfish/squid/shrimp/crab/snails, etc., marine fish, freshwater fish (river fish/lake fish, etc.), small fish/small shrimps. |
| Total red meat    | Roast sausages/ham sausages/meatball, etc. (not curing), bacon/sausages/ham, pig skin (with or without pork), meat (pork, beef, mutton, etc.), liver, organ meat (except liver).                                                                                                                                                                      |
| Total white meat  | Poultry (chicken, duck, goose, etc.), shellfish/squid/shrimp/crab/snails, etc., marine fish, freshwater fish (river fish/lake fish, etc.), small fish/small shrimps.                                                                                                                                                                                  |
| Fish and seafoods | Shellfish/squid/shrimp/crab/snails, etc., marine fish, freshwater fish (river fish/lake fish, etc.), small fish/small shrimps.                                                                                                                                                                                                                        |
| Poultry           | Poultry (chicken, duck, goose, etc.)                                                                                                                                                                                                                                                                                                                  |
| Unprocessed meat  | Pig skin (with or without pork), meat (pork, beef, mutton, etc.), liver, organ meat (except liver).                                                                                                                                                                                                                                                   |
| Processed meat    | Roast sausages/ham sausages/meatball, etc. (not curing), bacon/sausages/ham.                                                                                                                                                                                                                                                                          |

**Supplementary Table 2.** Data collection on meat intake and cooking methods of meat

| Variables                                              | Frequencies of consumption |            |                |                |             |                 |              |
|--------------------------------------------------------|----------------------------|------------|----------------|----------------|-------------|-----------------|--------------|
| <b>Meat and meat products</b>                          |                            |            |                |                |             |                 |              |
| Poultry (chicken, duck, goose, etc.)                   | ≥2 times/day               | 1 time/day | 4-6 times/week | 2-3 times/week | 1 time/week | 2-3 times/month | almost never |
| Meat (pork, beef, mutton, etc.)                        | ≥2 times/day               | 1 time/day | 4-6 times/week | 2-3 times/week | 1 time/week | 2-3 times/month | almost never |
| Liver                                                  | ≥2 times/day               | 1 time/day | 4-6 times/week | 2-3 times/week | 1 time/week | 2-3 times/month | almost never |
| Organ meat (except liver)                              | ≥2 times/day               | 1 time/day | 4-6 times/week | 2-3 times/week | 1 time/week | 2-3 times/month | almost never |
| Roast sausages/ham sausages/meatball, etc. (not cured) | ≥2 times/day               | 1 time/day | 4-6 times/week | 2-3 times/week | 1 time/week | 2-3 times/month | almost never |
| Pig skin (with or without pork)                        | ≥2 times/day               | 1 time/day | 4-6 times/week | 2-3 times/week | 1 time/week | 2-3 times/month | almost never |
| Bacon/sausages/ham                                     | ≥2 times/day               | 1 time/day | 4-6 times/week | 2-3 times/week | 1 time/week | 2-3 times/month | almost never |
| <b>Fish and seafoods</b>                               |                            |            |                |                |             |                 |              |
| Shellfish/squid/shrimp/crab/snails, etc.               | ≥2 times/day               | 1 time/day | 4-6 times/week | 2-3 times/week | 1 time/week | 2-3 times/month | almost never |
| Marine fish                                            | ≥2 times/day               | 1 time/day | 4-6 times/week | 2-3 times/week | 1 time/week | 2-3 times/month | almost never |
| Freshwater fish (river fish/lake fish, etc.)           | ≥2 times/day               | 1 time/day | 4-6 times/week | 2-3 times/week | 1 time/week | 2-3 times/month | almost never |
| Small fish/small shrimps                               | ≥2 times/day               | 1 time/day | 4-6 times/week | 2-3 times/week | 1 time/week | 2-3 times/month | almost never |
| <b>Cooking methods of meat</b>                         |                            |            |                |                |             |                 |              |
| Fried meat                                             | ≥2 times/day               | 1 time/day | 4-6 times/week | 2-3 times/week | 1 time/week | 2-3 times/month | almost never |
| Stewed meat                                            | ≥2 times/day               | 1 time/day | 4-6 times/week | 2-3 times/week | 1 time/week | 2-3 times/month | almost never |
| Roasted meat                                           | ≥2 times/day               | 1 time/day | 4-6 times/week | 2-3 times/week | 1 time/week | 2-3 times/month | almost never |
| Stir-fried meat                                        | ≥2 times/day               | 1 time/day | 4-6 times/week | 2-3 times/week | 1 time/week | 2-3 times/month | almost never |
| Steamed meat                                           | ≥2 times/day               | 1 time/day | 4-6 times/week | 2-3 times/week | 1 time/week | 2-3 times/month | almost never |
| <b>Cooking methods of fish or seafoods</b>             |                            |            |                |                |             |                 |              |
| Fried fish or seafoods                                 | ≥2 times/day               | 1 time/day | 4-6 times/week | 2-3 times/week | 1 time/week | 2-3 times/month | almost never |
| Braised fish or seafoods                               | ≥2 times/day               | 1 time/day | 4-6 times/week | 2-3 times/week | 1 time/week | 2-3 times/month | almost never |
| Baked fish or seafoods                                 | ≥2 times/day               | 1 time/day | 4-6 times/week | 2-3 times/week | 1 time/week | 2-3 times/month | almost never |
| Steamed fish or seafoods                               | ≥2 times/day               | 1 time/day | 4-6 times/week | 2-3 times/week | 1 time/week | 2-3 times/month | almost never |
| Raw fish or seafoods                                   | ≥2 times/day               | 1 time/day | 4-6 times/week | 2-3 times/week | 1 time/week | 2-3 times/month | almost never |

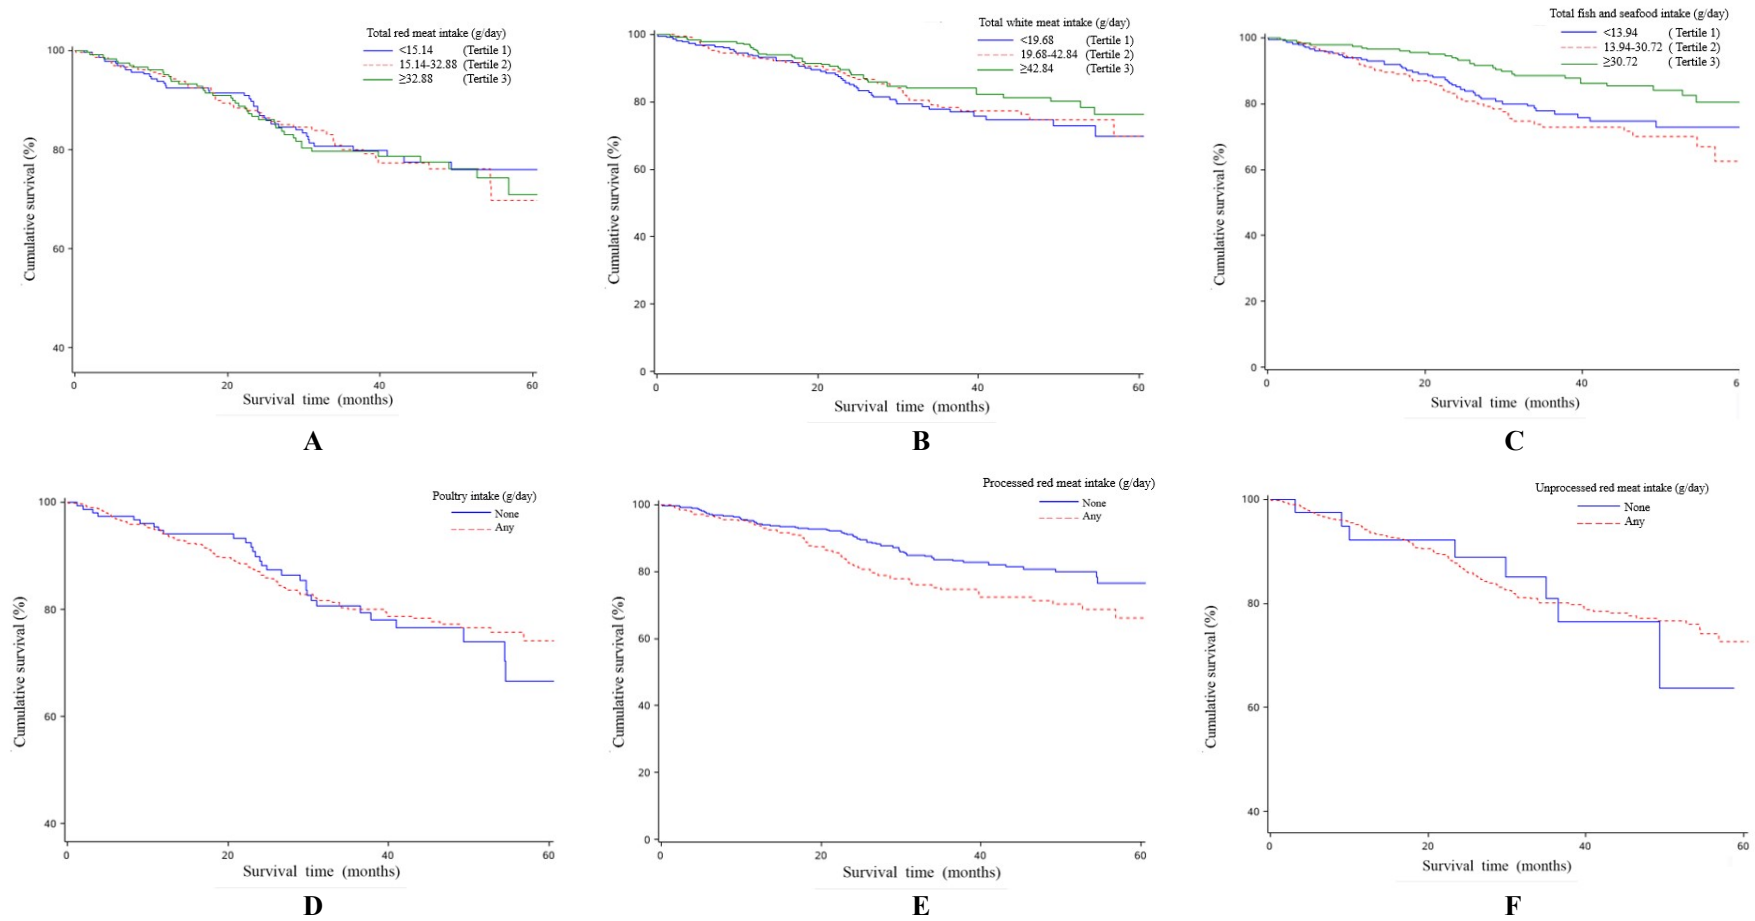

**Supplementary Figure 1 Kaplan-Meier survival curves. A: total red meat intake; B: total white meat intake; C: total fish and seafood intake; D: poultry intake; E: processed red meat intake; F: unprocessed red meat intake**

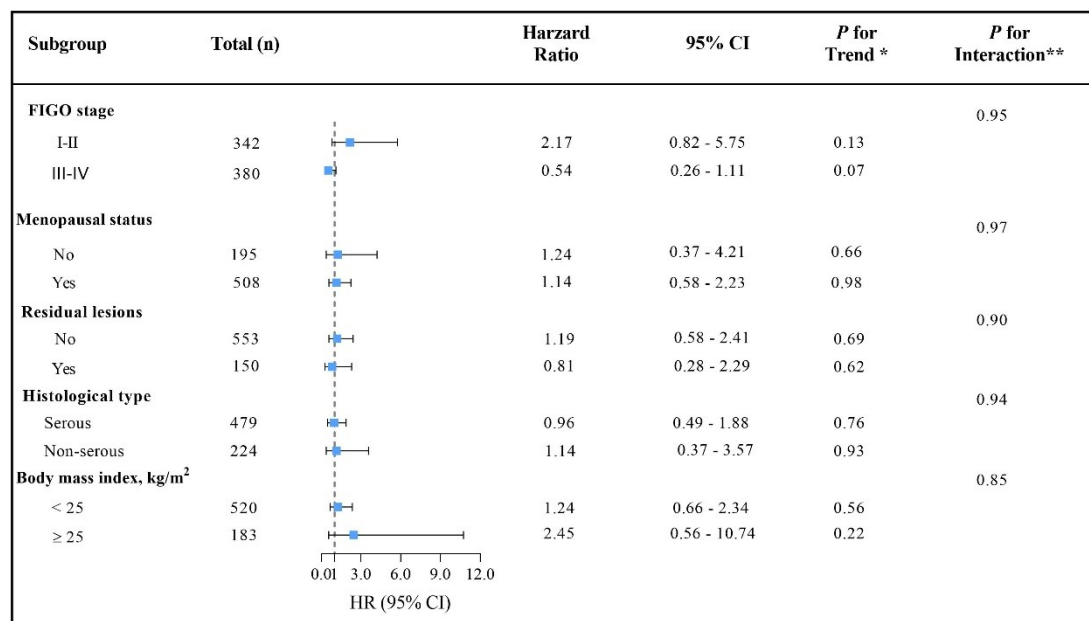

A

**Supplementary Figure 2 Overall survival among ovarian cancer patients across strata of various factors. (A) total red meat intake; (B) total white meat intake; (C) fish and seafood intake; (D) poultry intake; (E) processed red meat intake; (F) unprocessed red meat intake**

The analyses used three categories of total red meat intake ( $T_1 < 15.14$ ,  $T_2 15.14-32.88$ , and  $T_3 \geq 32.88$  g/d); total white meat intake ( $T_1 < 19.68$ ,  $T_2 19.68-42.84$ , and  $T_3 \geq 42.84$  g/d); fish and seafood intake ( $T_1 < 13.94$ ,  $T_2 13.94-30.72$ , and  $T_3 \geq 30.72$  g/d). The forest plot represents the HRs of the comparison of the highest versus the lowest of red meat, white meat, and fish and seafood intake or the comparison of any poultry meat, processed red meat, and unprocessed red meat intake versus no intake. Cox model stratified by FIGO stage, menopausal status, residual lesions, histological type, and body mass index, with additional adjustments for age at diagnosis, total energy, body mass index, diet change, education, FIGO stage, histological type, histopathologic grade, menopausal status, parity, physical activity, residual lesions, smoke status, dietary pattern, and cooking methods of meat (fried meat, stewed meat, roasted meat, stir-fried meat, and steamed meat) or cooking methods of fish and seafoods (fried fish, braised fish, baked fish, steamed fish, and raw fish) only for fish and seafood intake.

\* indicates *P* for trend across levels of total red meat, white meat, or fish and seafood intake or \* indicates *P* for interaction between strata and poultry meat, processed red meat, or processed red meat intake.

\*\* indicates *P* for interaction between strata and total red meat, white meat, or fish and seafood intake.

*P* values are two-sided.

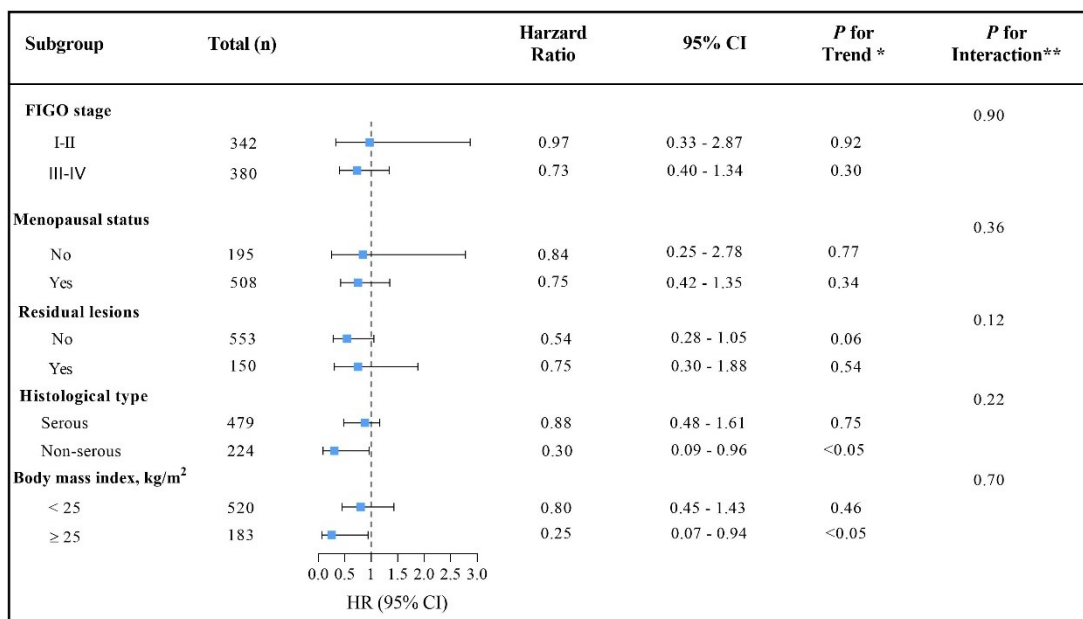

**B**

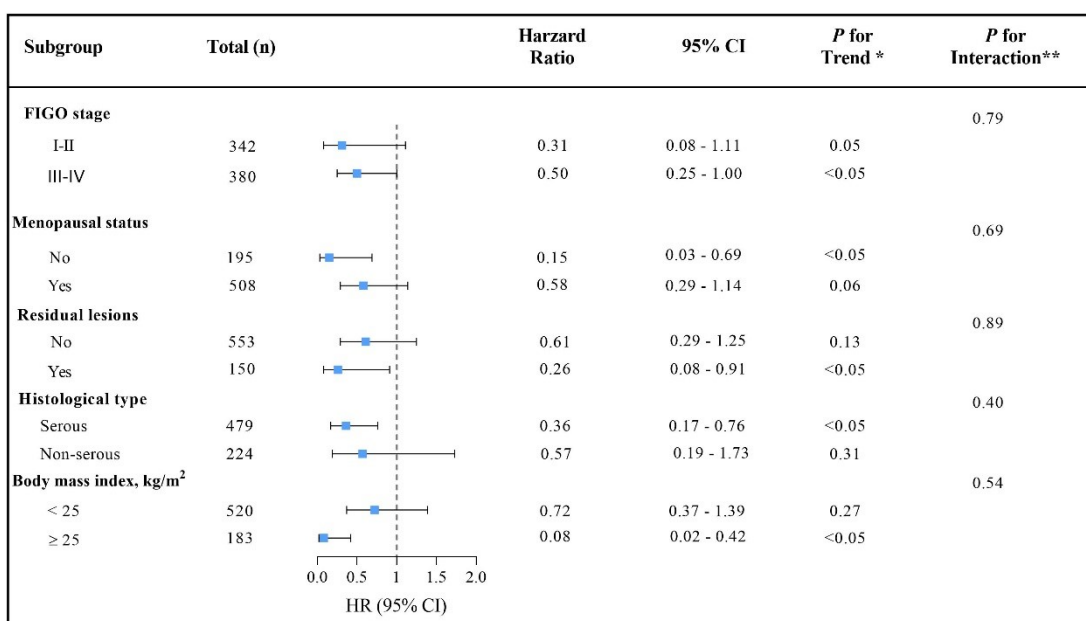

**C**

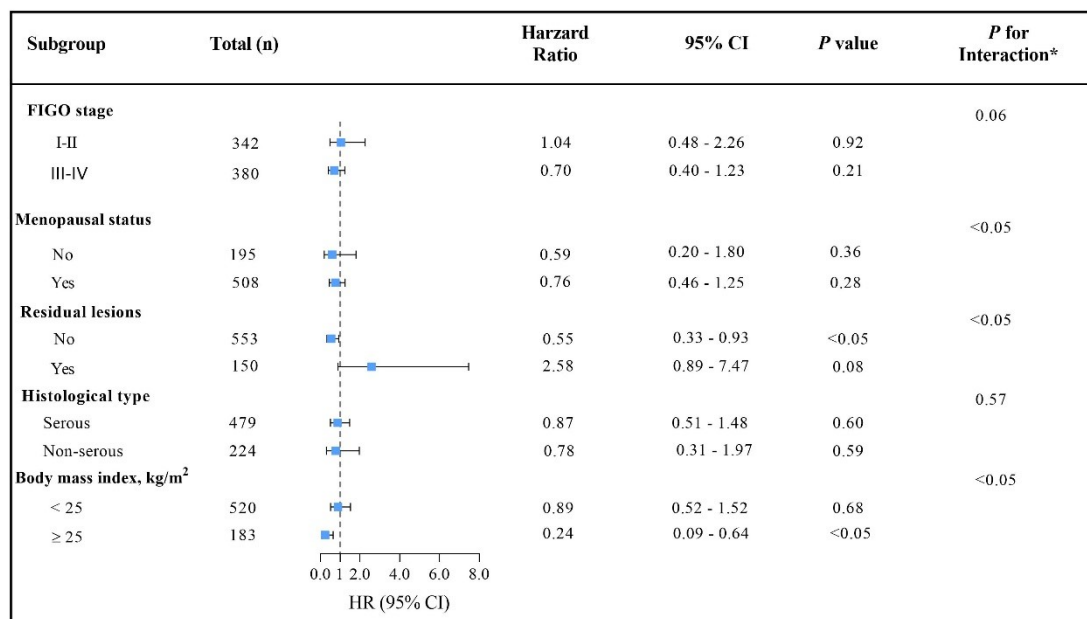

D

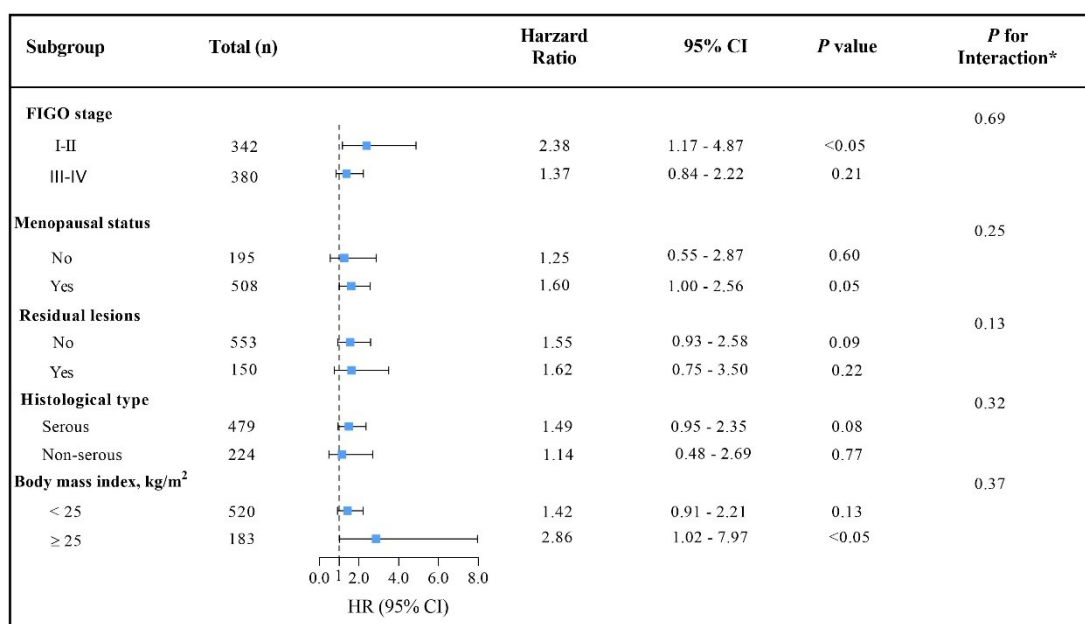

E

| Subgroup                                 | Total (n) | Harzard Ratio | 95% CI       | P value | P for Interaction* |
|------------------------------------------|-----------|---------------|--------------|---------|--------------------|
| <b>FIGO stage</b>                        |           |               |              |         |                    |
| I-II                                     | 342       | 0.76          | 0.20 - 2.90  | 0.68    | 0.83               |
| III-IV                                   | 380       | 0.93          | 0.35 - 2.49  | 0.88    |                    |
| <b>Menopausal status</b>                 |           |               |              |         |                    |
| No                                       | 195       | 0.21          | 0.03 - 1.33  | 0.10    | 0.97               |
| Yes                                      | 508       | 0.87          | 0.34 - 2.26  | 0.77    |                    |
| <b>Residual lesions</b>                  |           |               |              |         |                    |
| No                                       | 553       | 0.56          | 0.23 - 1.37  | 0.20    | 0.97               |
| Yes                                      | 150       | 7.49          | 0.76 - 74.29 | 0.09    |                    |
| <b>Histological type</b>                 |           |               |              |         |                    |
| Serous                                   | 479       | 0.76          | 0.26 - 2.22  | 0.62    | 0.95               |
| Non-serous                               | 224       | 0.59          | 0.15 - 2.33  | 0.45    |                    |
| <b>Body mass index, kg/m<sup>2</sup></b> |           |               |              |         |                    |
| < 25                                     | 520       | 0.73          | 0.27 - 1.93  | 0.52    | 0.92               |
| ≥ 25                                     | 183       | 0.43          | 0.09 - 2.09  | 0.29    |                    |

F
